# Supplementary material for: MME+ fibro-adipogenic progenitors are the dominant adipogenic population during fatty infiltration in human skeletal muscle
Source: Springer Nature journal article supplement (doi:10.1038/s42003-023-04504-y), 2023-01-27
Supplement: 42003_2023_4504_MOESM3_ESM.pdf [file 42003_2023_4504_MOESM3_ESM.pdf]

## **Description of Additional Supplementary Files**

File name: Supplementary Data 1

Description: The source data behind the graphs in the paper
